# Supplementary material for: Regional cortical thinning, demyelination and iron loss in cerebral small vessel disease
Source: PubMed Central journal article supplement — Brain. 2023 Jun 27;146(11):4659–73. doi: 10.1093/brain/awad220 (PMC10629800; doi:10.1093/brain/awad220), 2023-06-27
Supplement: awad220_supplementary_data.pdf [file awad220_supplementary_data.pdf]

# Supplementary material

## Materials and methods

### Neuropsychological assessment

Processing speed was assessed using the Trail Making Test A (TMT-A) and Symbol-Digit Modalities Test (SDMT); executive function was assessed using the TMT-A, TMT-B, the Verbal Fluency test (animal and job naming); memory was assessed using the forward and backward scores of the Digit Span test, the immediate and delayed recall scores of the Rey Auditory Verbal Learning Test (RAVLT) and the delayed recall score of Rey-Osterrieth Complex Figure Test (RCFT). The raw test scores were standardized as z-scores. Next, compound scores were computed per cognitive domain: processing speed was calculated by the sum of (1) the inverse Z score of the TMT-A, (2) the Z score of SDMT; executive function was calculated by the sum of (1) the inverse Z score of the TMT ratio (TMT-B/TMT-A), (2) the average Z score of Verbal Fluency Test of animal naming and job naming; memory was calculated as the sum of (1) the Z score of DST, (2) the average Z score of RAVLT of immediate recall and delayed recall; (3) the average Z score of ROCF of immediate recall and delayed recall. (Supplementary Table e-1).

**Table e-1. Calculation of each cognitive domain**

| Cognitive domain   | Cognitive test                                                            | Calculation of compound score                                                                                                 |
|--------------------|---------------------------------------------------------------------------|-------------------------------------------------------------------------------------------------------------------------------|
| Processing speed   | Trail Making Test A                                                       | $Z_{\text{TMT-A}} \times -1 + Z_{\text{SDMT}}/2$                                                                              |
|                    | Symbol-Digit Modalities Test                                              |                                                                                                                               |
| Executive function | Trail Making Test A                                                       | $Z_{(\text{TMT-B/TMT-A})} \times -1 + (Z_{\text{VFT-A}} + Z_{\text{VFT-J}})/2$                                                |
|                    | Trail Making Test B                                                       |                                                                                                                               |
|                    | Verbal Fluency Test (Animals and jobs)                                    |                                                                                                                               |
| Memory             | Digit span test (Forward and backward)                                    | $Z_{(\text{DST-f} + \text{DST-b})} + (Z_{\text{RAVLT-I}} + Z_{\text{RAVLT-D}})/2 + (Z_{\text{ROCF-I}} + Z_{\text{ROCF-D}})/2$ |
|                    | Rey's Auditory Verbal learning test (Immediate recall and delayed recall) |                                                                                                                               |
|                    | Rey-Osterrieth Complex Figure Test (Immediate recall and delayed recall)  |                                                                                                                               |

Z, the Z transformed score; DST-f, Digit span forward test; DST-b, Digit span backward test; RAVLT-I, the Immediate recall of Rey's Auditory Verbal learning test; RAVLT-D, the delayed recall of Rey's Auditory Verbal learning test; ROCF-I, the Immediate recall of Rey-Osterrieth Complex Figure Test;

ROCF -D, the delayed recall of Rey–Osterrieth Complex Figure Test; TMT, Trail Making Test; SDMT, Symbol-Digit Modalities Test, VFT-A, Verbal Fluency Test (animals); VFT-A, Verbal Fluency Test (jobs)

## **MRI acquisition**

Parameters for each sequence: 3D T1-weighted Magnetization Prepared 2 Rapid Acquisition Gradient Echoes (MP2RAGE): 0.85mm isotropic voxels, repetition time (TR) = 5500 ms, inversion time (TI1 and TI2) = 700 and 2500 ms, field of view (FOV) = 218×272mm<sup>2</sup>, Flip Angle = 4; 3D multi-echo fast low-angle shot images (9 echoes): 0.85mm isotropic voxels, TR = 44ms,  $\Delta$ TE = 4ms, FOV = 197×245mm<sup>2</sup>, Flip angle = 20; 3D fluid-attenuated inversion recovery (FLAIR) image: 0.85mm isotropic voxels, TR = 5000ms, TE = 394 ms, TI = 1800ms, FOV = 163×272mm<sup>2</sup>, Flip angle = 120; Multi-shell DWI using multi-band accelerated echo planar imaging (EPI): 99 diffusion-weighted directions ( $3 \times b = 200$ ,  $6 \times b = 500$ ,  $30 \times b = 1,000$ , and  $60 \times b = 3,000$ s/mm<sup>2</sup>),  $10 \times b = 0$  images, 1.7mm isotropic voxels, TR = 3220ms, TE = 74 ms, FOV = 221×221mm<sup>2</sup>, Flip angle = 90; one b=0 image with acquisition parameters equal to the previous b=0 images, but acquired in opposite phase-encoding direction.

## **Identification of connected cortex**

The WMH masks derived from the FLAIR images were linearly registered to T1 images and then to diffusion images using Functional MRI of the brain linear image registration tool (FLIRT).<sup>1,2</sup> The white/grey matter boundaries were also linearly registered to the diffusion images. Probabilistic tractography was performed from the WMH masks to the white/grey matter boundaries in the diffusion spaces. This was done using the probtractx2 function from FSL with the following parameters: number of samples = 5000, number of steps per sample = 2000, step length in mm = 0.5, curvature threshold = 0.2.<sup>3</sup> The WM/GM matter boundary was additionally used to constrain tractography. Resulting tracts were registered to T1 images using the inversed transformation matrix from T1 images to diffusion images generated in above registering steps. Regions where the tracts reached the white/grey matter boundaries were defined as the WMH-connected regions. To determine different levels of the connectivity probability between the cortex and the WMH lesion, the resulting WMH-connected regions were thresholded at different levels. Based on a previously published study,<sup>4-6</sup> the threshold of the lowest level set at  $3.08 \times 10^{-5}$  percent of the total streamlines sent out from the seed

masks (5000 times per voxel). WMH-connected regions with the medium and high levels of connectivity probability were determined by gradually increasing the values of the threshold until the volumes of thresholded the WMH-connected regions reached 50% (medium level) or 25% (high level) of the volumes of the low-level WMH-connected regions, as used in previous similar studies.<sup>7,8</sup>

## Results

Table e-2. Results on each cognitive task

| Cognitive task                 | Raw score          |
|--------------------------------|--------------------|
| DST                            |                    |
| Forward, median (IQR)          | 9.0 (7.0-10.0)     |
| backward, median (IQR)         | 5.0 (4.0-7.0)      |
| RAVLT                          |                    |
| Immediate recall, median (IQR) | 22.0 (19.0-25.0)   |
| Delayed recall, median (IQR)   | 7.0 (4.0-8.8)      |
| ROCF (Delayed recall)          |                    |
| Immediate recall, median (IQR) | 21.0 (16.0-25.0)   |
| Delayed recall, median (IQR)   | 20.0 (16.0-24.0)   |
| TMT-A, median (IQR)            | 45.2 (36.3-63.0)   |
| TMT-B, median (IQR)            | 103.0 (81.3-153.1) |
| SDMT, median (IQR)             | 41.0 (32.0-47.8)   |
| VFT, median (IQR)              |                    |
| Animals                        | 20.0 (16.0-23.0)   |
| Jobs                           | 15.0 (11.0-18.0)   |

DST, Digit span forward test; RAVLT, Rey's Auditory Verbal learning test; ROCF, Rey-Osterrieth Complex Figure Test; TMT, Trail Making Test; SDMT, Symbol-Digit Modalities Test; VFT, Verbal Fluency Test.

Table e-3.the connectivity probabilities of WMH to different cortical regions at three connectivity levels

| Location  | Desikan-Killiany atlas   | High level      | Medium level    | Low level       |
|-----------|--------------------------|-----------------|-----------------|-----------------|
| Frontal   | superiorfrontal          | <b>0.24888</b>  | <b>0.53337</b>  | 0.838535        |
|           | caudalmiddlefrontal      | 0.13648         | 0.291265        | 0.63656         |
|           | rostralmiddlefrontal     | 0.20227         | 0.361045        | 0.70671         |
|           | frontalpole              | <b>0.53674</b>  | <b>0.8502</b>   | <b>0.978905</b> |
|           | parsopercularis          | <b>0.25371</b>  | 0.47833         | 0.785365        |
|           | parsorbitalis            | 0.21318         | <b>0.551245</b> | <b>0.880005</b> |
|           | parstriangularis         | <b>0.37015</b>  | <b>0.577375</b> | <b>0.872145</b> |
|           | lateralorbitofrontal     | 0.07688         | 0.186365        | 0.523905        |
|           | medialorbitofrontal      | 0.21972         | 0.3239          | 0.666365        |
|           | precentral               | 0.20678         | 0.374775        | 0.72977         |
|           | paracentral              | 0.142375        | 0.47744         | <b>0.851065</b> |
| parietal  | postcentral              | 0.18307         | 0.250905        | 0.59474         |
|           | superiorparietal         | 0.170905        | 0.37492         | 0.714645        |
|           | inferiorparietal         | 0.1724          | 0.23677         | 0.585205        |
|           | supramarginal            | 0.148655        | 0.22152         | 0.58727         |
|           | precuneus                | 0.158025        | 0.48017         | <b>0.838675</b> |
| Temporal  | bankssts                 | 0.144465        | 0.192505        | 0.587905        |
|           | transversetemporal       | 0.020885        | 0.138355        | 0.539115        |
|           | superiortemporal         | 0.16161         | 0.397985        | 0.82154         |
|           | temporalpole             | 0.06608         | 0.3185          | 0.723           |
|           | entorhinal               | 0.06187         | 0.113065        | 0.413925        |
|           | middletemporal           | 0.142515        | 0.32702         | 0.767805        |
|           | inferiortemporal         | 0.142755        | 0.353315        | 0.749355        |
|           | fusiform                 | 0.07921         | 0.20098         | 0.602855        |
| occipital | lateraloccipital         | 0.127265        | 0.24399         | 0.62291         |
|           | cuneus                   | 0.17711         | 0.446875        | 0.79251         |
|           | lingual                  | 0.169145        | 0.3489          | 0.711615        |
|           | pericalcarine            | <b>0.231805</b> | <b>0.53718</b>  | 0.814345        |
| insula    | insula                   | 0.158465        | 0.39924         | 0.716645        |
| limbic    | caudalanteriorcingulate  | 0.215755        | 0.513365        | 0.80609         |
|           | rostralanteriorcingulate | 0.182145        | 0.28347         | 0.64236         |
|           | posteriorcingulate       | 0.164535        | 0.401485        | 0.734815        |
|           | isthmuscingulate         | 0.205405        | 0.5194          | 0.825865        |
|           | parahippocampal          | 0.099665        | 0.275955        | 0.69001         |

Values in bold are the top-five ranking of cortical regions with highest connectivity probabilities to the WMH at each connectivity level.

Table e-4. Relation between normalized WMH volumes and the cortical thickness, R1, R2\*, susceptibility values of the WMH-connected regions at three connectivity levels

|                                               | WMH volumes |                          |
|-----------------------------------------------|-------------|--------------------------|
|                                               | $\beta$     | <i>p-corrected value</i> |
| Cortical thickness (WMH-connected regions)    |             |                          |
| Low level                                     | -0.25       | <b>0.006</b>             |
| Medium level                                  | -0.23       | <b>0.046</b>             |
| High level                                    | -0.09       | 0.395                    |
| R1 values (WMH-connected regions)             |             |                          |
| Low level                                     | -0.05       | 0.632                    |
| Medium level                                  | 0.09        | 0.632                    |
| High level                                    | 0.14        | 0.510                    |
| R2* values (WMH-connected regions)            |             |                          |
| Low level                                     | -0.08       | 0.908                    |
| Medium level                                  | 0.09        | 0.836                    |
| High level                                    | -0.01       | 0.908                    |
| Susceptibility values (WMH-connected regions) |             |                          |
| Low level                                     | -0.04       | 0.846                    |
| Medium level                                  | -0.05       | 0.846                    |
| High level                                    | 0.02        | 0.846                    |

WMH, white matter hyperintensities; normalized WMH volumes, WMH volumes were normalized by the intracranial volume (ICV); bold values: *p-corrected* < 0.05, p values were corrected for multiple comparisons using *Hommel-Hochberg* method.

Table e-5. Relation between the cortical thickness, R1, R2\*, susceptibility values of the WMH-connected regions and cognitive function at three connectivity levels (Model 2)

|                                                 | Processing speed |                           | Executive function |                           | Memory  |                           |
|-------------------------------------------------|------------------|---------------------------|--------------------|---------------------------|---------|---------------------------|
|                                                 | $\beta$          | <i>p</i> -corrected value | $\beta$            | <i>p</i> -corrected value | $\beta$ | <i>p</i> -corrected value |
| Cortical Thickness of the WMH-connected regions |                  |                           |                    |                           |         |                           |
| High level                                      | 0.15             | 0.131                     | -0.09              | 0.946                     | -0.02   | 0.993                     |
| Medium level                                    | 0.20             | 0.131                     | 0.06               | 0.946                     | 0.04    | 0.993                     |
| Low level                                       | 0.30             | 0.131                     | 0.36               | 0.154                     | 0.10    | 0.993                     |
| R1 of the WMH-connected regions                 |                  |                           |                    |                           |         |                           |
| High level                                      | 0.18             | <b>0.035</b>              | 0.06               | 0.946                     | 0.04    | 0.993                     |
| Medium level                                    | 0.20             | <b>0.018</b>              | 0.09               | 0.915                     | 0.08    | 0.993                     |
| Low level                                       | 0.21             | <b>0.030</b>              | 0.10               | 0.898                     | 0.10    | 0.993                     |
| R2* of the WMH-connected regions                |                  |                           |                    |                           |         |                           |
| High level                                      | 0.28             | <b>0.014</b>              | -0.14              | 0.800                     | 0.01    | 0.993                     |
| Medium level                                    | 0.42             | <b>0.002</b>              | -0.26              | 0.253                     | 0.02    | 0.993                     |
| Low level                                       | 0.37             | <b>0.011</b>              | -0.21              | 0.458                     | 0.09    | 0.993                     |
| Susceptibility of WMH-connected regions         |                  |                           |                    |                           |         |                           |
| High level                                      | 0.14             | 0.131                     | -0.04              | 0.946                     | 0.00    | 0.993                     |
| Medium level                                    | 0.22             | <b>0.025</b>              | -0.02              | 0.946                     | 0.00    | 0.993                     |
| Low level                                       | 0.25             | <b>0.030</b>              | 0.01               | 0.946                     | -0.02   | 0.993                     |

Model 2 is adjusted for age, education years, the areas of WMH-connected regions, the normalized WMH volumes, the mean cortical thickness or R1 or R2\* or susceptibility values of the WMH-unconnected regions, and the mean MD values of the connecting tracts; WMH, white matter hyperintensities, MD, mean diffusivity; bold values: *p*-corrected < 0.05, *p* values were corrected for multiple comparisons using *Hommel-Hochberg* method.

Table e-6. Factor load and model fit indicators of the latent variables using confirmatory factor analysis.

|                          | Latent variable 1<br>(WMH-connected regions) | Latent variable 2<br>(WMH-unconnected regions) |
|--------------------------|----------------------------------------------|------------------------------------------------|
| Standardized factor load |                                              |                                                |
| Cortical thickness       | 0.490                                        | 0.066                                          |
| R1 values                | 0.955                                        | 0.590                                          |
| R2* values               | 0.595                                        | 0.766                                          |
| Susceptibility values    | 0.862                                        | 0.364                                          |
| Model fit indicators     |                                              |                                                |
| CFI                      | 0.999                                        | >0.999                                         |
| RMSEA                    | 0.035                                        | <0.001                                         |
| SRMR                     | 0.020                                        | 0.021                                          |

Latent variable 1, representing global cortical abnormalities of WMH-connected; Latent variable 2, representing global cortical abnormalities of WMH-unconnected; WMH-connected and WMH-unconnected regions were identified at the high connectivity level. WMH, white matter hyperintensities; CFI, Comparative Fit Index; RMSEA, Root Mean Square Error of Approximation; SRMR, Standardized Root Mean Residual.

Table e-7. Relation between MD of the connecting tracts and the cortical thickness, R1, R2\*, susceptibility values of the WMH-unconnected regions at three connectivity levels

|                                                 | MD of the connecting tracts |                           |
|-------------------------------------------------|-----------------------------|---------------------------|
|                                                 | $\beta$                     | <i>p</i> -corrected value |
| Cortical thickness (WMH-unconnected regions)    |                             |                           |
| Low level                                       | -0.00                       | 0.997                     |
| Medium level                                    | -0.03                       | 0.997                     |
| High level                                      | -0.05                       | 0.959                     |
| R1 values (WMH-unconnected regions)             |                             |                           |
| Low level                                       | -0.08                       | 0.392                     |
| Medium level                                    | -0.06                       | 0.392                     |
| High level                                      | -0.06                       | 0.392                     |
| R2* values (WMH-unconnected regions)            |                             |                           |
| Low level                                       | -0.15                       | 0.060                     |
| Medium level                                    | -0.16                       | 0.062                     |
| High level                                      | -0.13                       | 0.064                     |
| Susceptibility values (WMH-unconnected regions) |                             |                           |
| Low level                                       | 0.10                        | 0.201                     |
| Medium level                                    | 0.04                        | <b>0.018</b>              |
| High level                                      | 0.21                        | <b>0.006</b>              |

WMH, white matter hyperintensities; MD, mean diffusivity; bold values: *p*-corrected < 0.05, *p* values were corrected for multiple comparisons using *Hommel-Hochberg* method.



Table e-8. Relation between normalized WMH volumes and the cortical thickness, R1, R2\*, susceptibility values of the WMH-unconnected at three connectivity levels

|                                                 | Normalized WMH volumes |                           |
|-------------------------------------------------|------------------------|---------------------------|
|                                                 | $\beta$                | <i>p</i> -corrected value |
| Cortical thickness (WMH-unconnected regions)    |                        |                           |
| Low level                                       | -0.23                  | <b>0.012</b>              |
| Medium level                                    | -0.15                  | 0.057                     |
| High level                                      | -0.15                  | 0.057                     |
| R1 values (WMH-unconnected regions)             |                        |                           |
| Low level                                       | -0.07                  | 0.926                     |
| Medium level                                    | -0.05                  | 0.926                     |
| High level                                      | -0.01                  | 0.926                     |
| R2* values (WMH-unconnected regions)            |                        |                           |
| Low level                                       | -0.14                  | 0.480                     |
| Medium level                                    | -0.05                  | 0.652                     |
| High level                                      | -0.06                  | 0.652                     |
| Susceptibility values (WMH-unconnected regions) |                        |                           |
| Low level                                       | -0.19                  | 0.189                     |
| Medium level                                    | -0.05                  | 0.622                     |
| High level                                      | -0.05                  | 0.622                     |

WMH, white matter hyperintensities, normalized WMH volumes, WMH volumes were normalized by the intracranial volume (ICV); bold values: *p*-corrected < 0.05, *p* values were corrected for multiple comparisons using *Hommel-Hochberg* method.

Table e-9. Relation between MD of the connecting tracts, normalized WMH volumes and the R1, R2\*, susceptibility values of the WMH-connected regions while adjusting for cortical thickness at three connectivity levels.

|                                               | Normalized WMH volumes |                     | MD of the connecting tracts |                     |
|-----------------------------------------------|------------------------|---------------------|-----------------------------|---------------------|
|                                               | $\beta$                | <i>p</i> -corrected | $\beta$                     | <i>p</i> -corrected |
| R1 values (WMH-connected regions)             |                        |                     |                             |                     |
| Low                                           | -0.06                  | 0.559               | -0.14                       | 0.069               |
| Medium                                        | 0.09                   | 0.559               | -0.12                       | 0.069               |
| High                                          | 0.13                   | 0.438               | -0.11                       | 0.069               |
| R2* values (WMH-connected regions)            |                        |                     |                             |                     |
| Low                                           | -0.01                  | 0.937               | -0.15                       | <b>0.031</b>        |
| Medium                                        | 0.11                   | 0.937               | -0.22                       | <b>0.008</b>        |
| High                                          | 0.01                   | 0.937               | -0.29                       | <b>&lt;0.001</b>    |
| Susceptibility values (WMH-connected regions) |                        |                     |                             |                     |
| Low                                           | -0.03                  | 0.763               | -0.02                       | 0.792               |
| Medium                                        | -0.02                  | 0.763               | -0.10                       | 0.142               |
| High                                          | 0.04                   | 0.763               | -0.15                       | <b>0.042</b>        |

WMH, white matter hyperintensities, normalized WMH volumes, WMH volumes were normalized by the intracranial volume (ICV); MD, mean diffusivity; bold values: *p*-corrected < 0.05, *p* values were corrected for multiple comparisons using *Hommel-Hochberg* method.

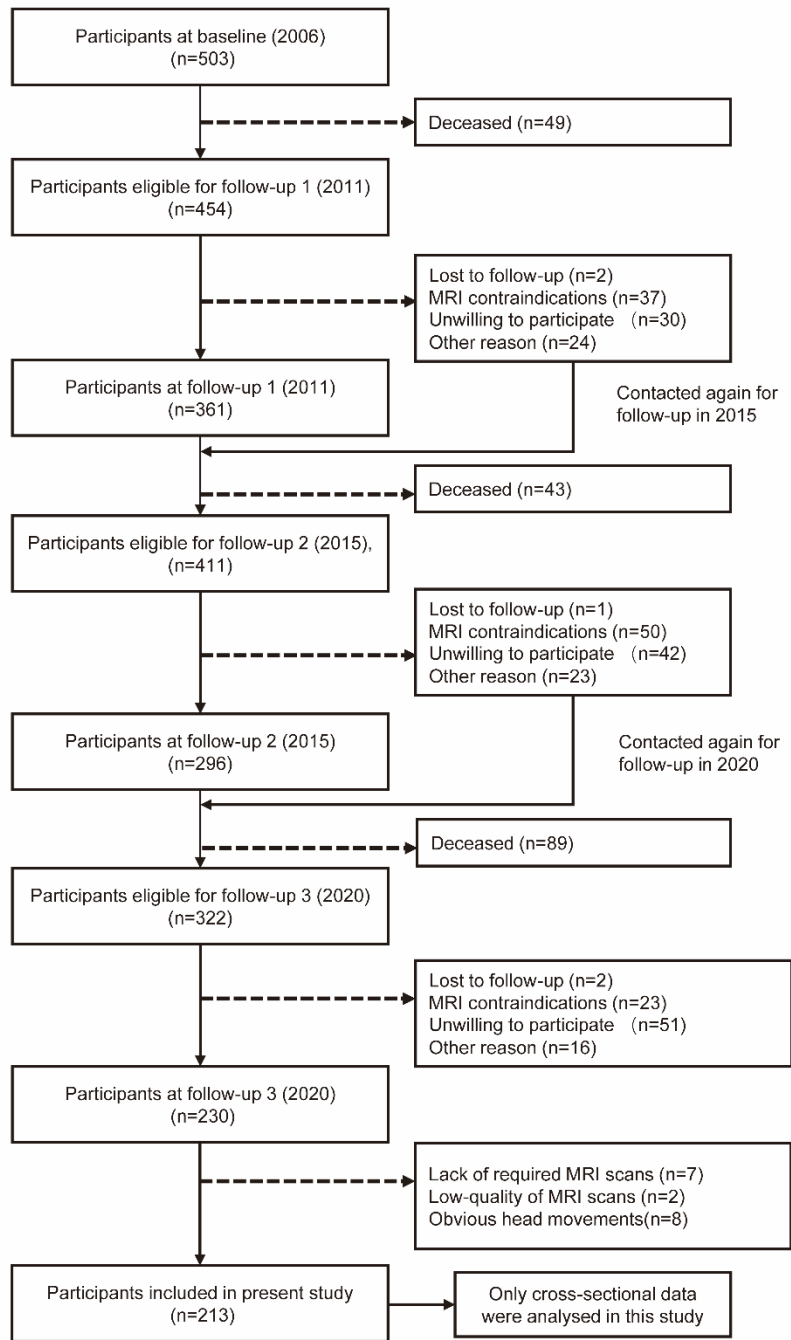

Figure e-1. Flow chart of the present study.

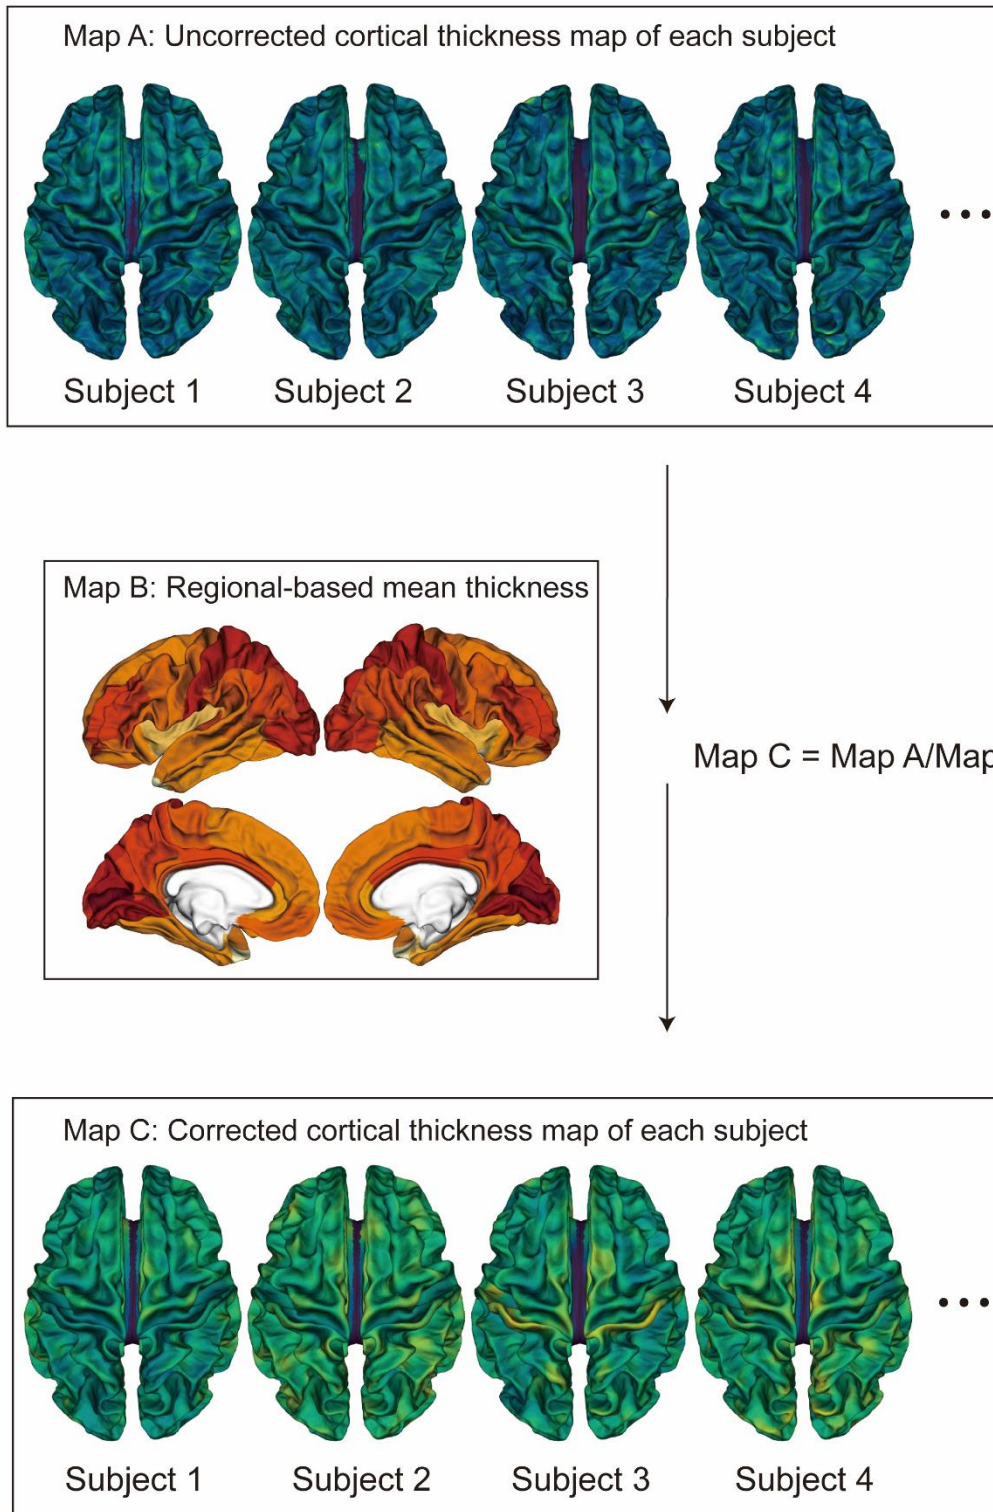

Figure e-2 Schematic diagram of correcting the inter-regional differences in cortical thickness. Similar steps were performed in the surface-based R1, R2\* and susceptibility maps of each participant to correct the inter-regional differences in myelin and iron.

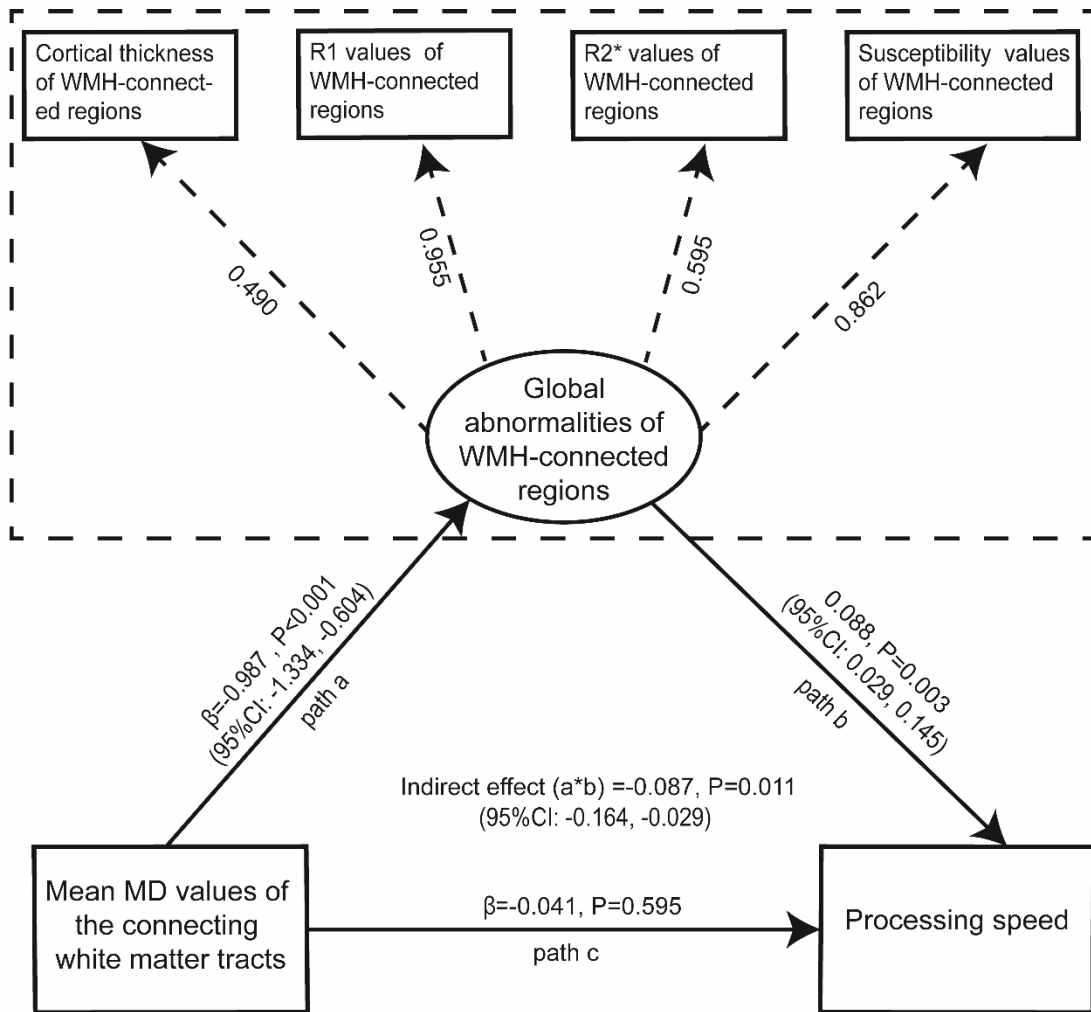

Figure e-3. Structural equation model for the relations between the microstructural damage of the connecting white matter tract, the abnormalities of WMH-connected regions and cognitive performances. WMH-connected regions were identified at the high-connectivity level. Covariances and control variables were omitted for readability. Upper panel: the confirmatory factor analysis (CFA) used to fit the latent variable representing global cortical abnormalities of the WMH-connected regions, the values attached to each dashed arrow are standardized factor load of each cortical measurements on the constructed latent variable; Lower panel: the mediation analysis, of mean MD values of the connecting white matter tract, the global cortical abnormalities of the WMH-connected regions and processing speed, path a: relationship between mean MD values of the connecting white matter tract and global cortical abnormalities of the WMH-connected regions, path b: relationship between global cortical abnormalities of the WMH-connected regions and processing speed. path c: direct relationship between mean MD values of the connecting white matter tract and processing speed. MD, mean diffusivity; WMH, white matter hyperintensities; 95% CI, 95% confidence interval.

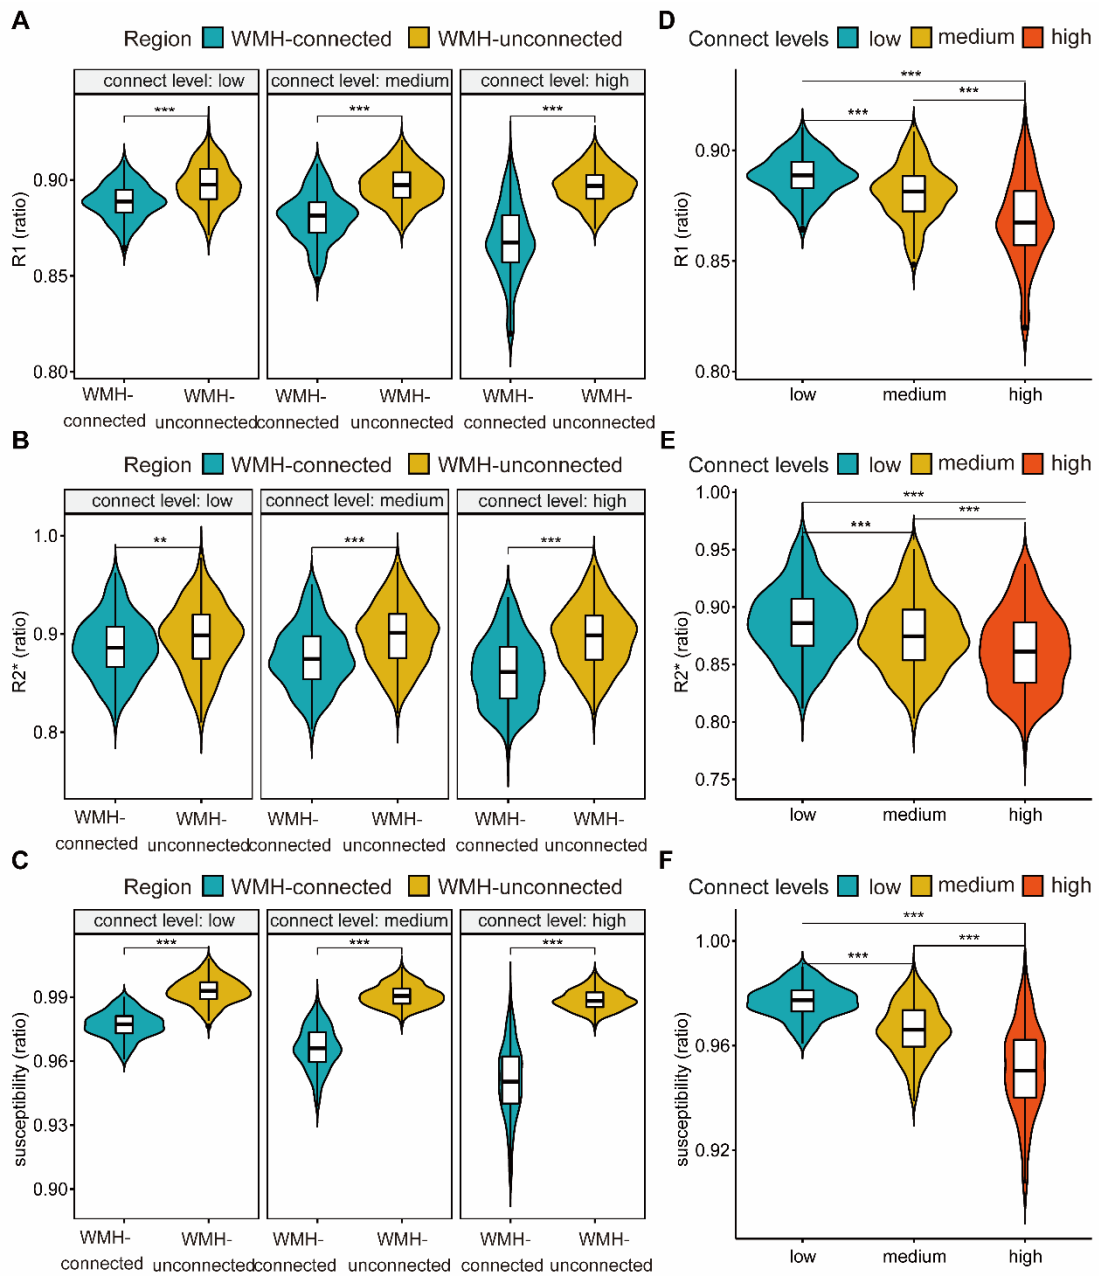

Figure e-4. Comparison of R1, R2\*, susceptibility values between WMH-connected regions and WMH-unconnected regions (A-C), and between different connectivity levels (D-F) while adjusting cortical thickness. \*\*,  $p$ -corrected < 0.01, \*\*\*,  $p$ -corrected < 0.001

## Reference

1. Jenkinson M, Smith S. A global optimisation method for robust affine registration of brain images. *Medical image analysis*. Jun 2001;5(2):143-56. doi:10.1016/s1361-8415(01)00036-6
2. Jenkinson M, Bannister P, Brady M, Smith S. Improved optimization for the robust and accurate linear registration and motion correction of brain images. *NeuroImage*. Oct 2002;17(2):825-41. doi:10.1016/s1053-8119(02)91132-8
3. Behrens TE, Berg HJ, Jbabdi S, Rushworth MF, Woolrich MW. Probabilistic diffusion tractography with multiple fibre orientations: What can we gain? *NeuroImage*. Jan 1 2007;34(1):144-55. doi:10.1016/j.neuroimage.2006.09.018
4. Rilling JK, Glasser MF, Preuss TM, et al. The evolution of the arcuate fasciculus revealed with comparative DTI. *Nature neuroscience*. Apr 2008;11(4):426-8. doi:10.1038/nn2072
5. Zhuo J, Fan L, Liu Y, Zhang Y, Yu C, Jiang T. Connectivity Profiles Reveal a Transition Subarea in the Parahippocampal Region That Integrates the Anterior Temporal-Posterior Medial Systems. *The Journal of neuroscience : the official journal of the Society for Neuroscience*. Mar 2 2016;36(9):2782-95. doi:10.1523/jneurosci.1975-15.2016
6. Seifert R, Telli T, Opitz M, et al. Unspecific (18)F-PSMA-1007 Bone Uptake Evaluated Through PSMA-11 PET, Bone Scanning, and MRI Triple Validation in Patients with Biochemical Recurrence of Prostate Cancer. *Journal of nuclear medicine : official publication, Society of Nuclear Medicine*. May 2023;64(5):738-743. doi:10.2967/jnumed.118.215434
7. Duering M, Righart R, Csanadi E, et al. Incident subcortical infarcts induce focal thinning in connected cortical regions. *Neurology*. Nov 13 2012;79(20):2025-8. doi:10.1212/WNL.0b013e3182749f39
8. Duering M, Righart R, Wollenweber FA, Zietemann V, Gesierich B, Dichgans M. Acute infarcts cause focal thinning in remote cortex via degeneration of connecting fiber tracts. *Neurology*. Apr 21 2015;84(16):1685-92. doi:10.1212/wnl.0000000000001502
